# Supplementary material for: Ganoderma tsugae prevents cognitive impairment and attenuates oxidative damage in d-galactose-induced aging in the rat brain
Source: PubMed Central journal article supplement (PMC8989198; doi:10.1371/journal.pone.0266331), 2022-04-07

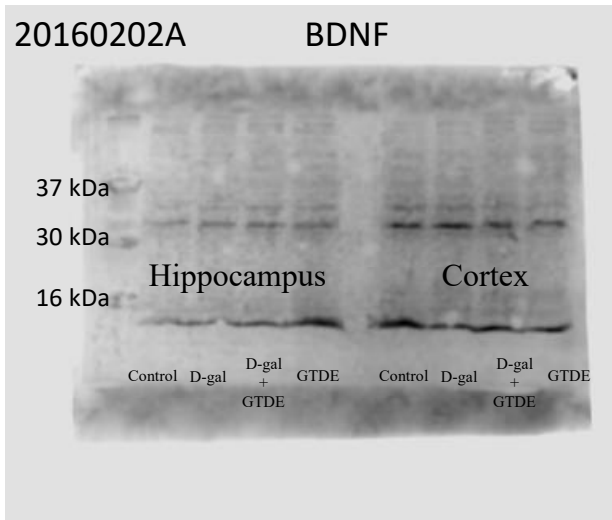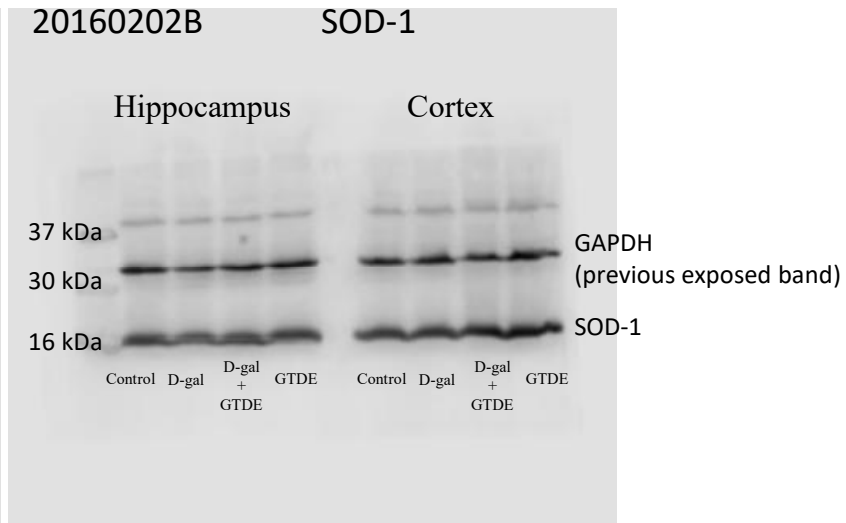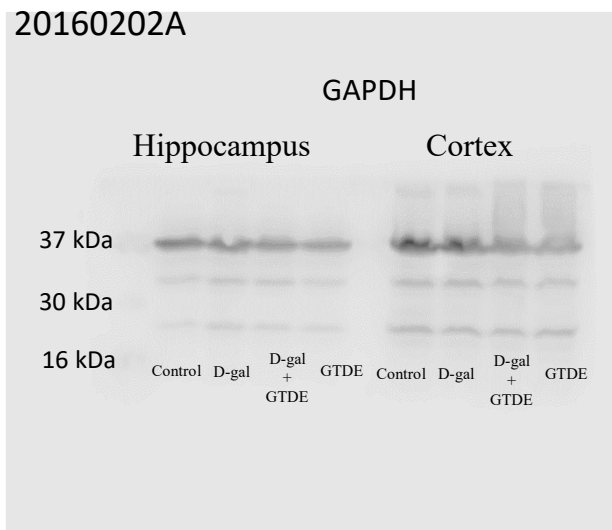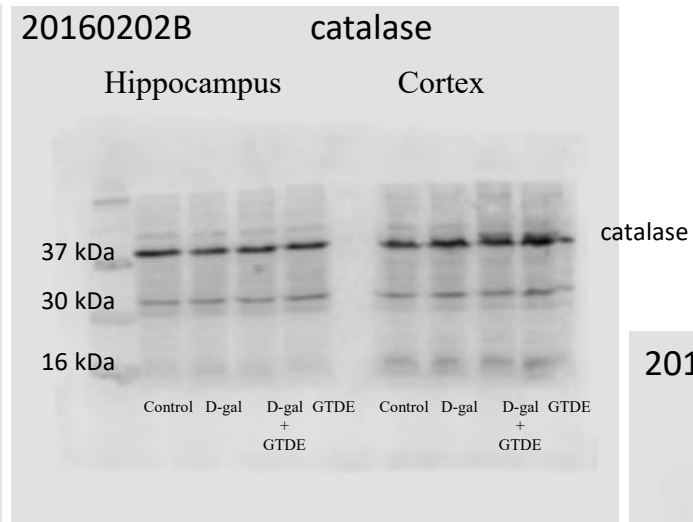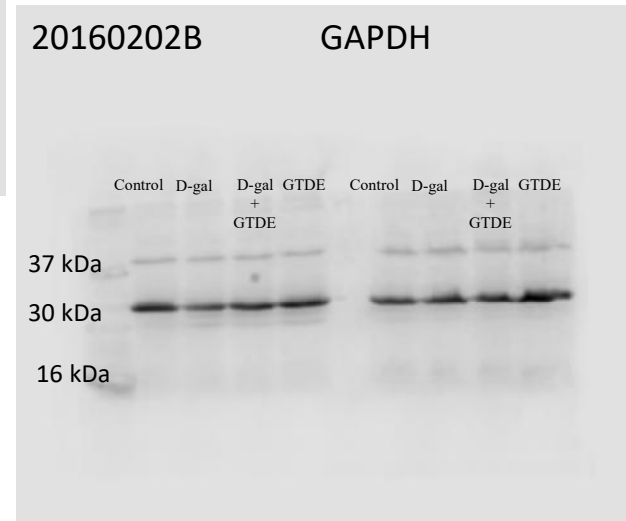

Hippocampus

D-  
gal+G  
TDE GTDE D-gal Control

NLRP3

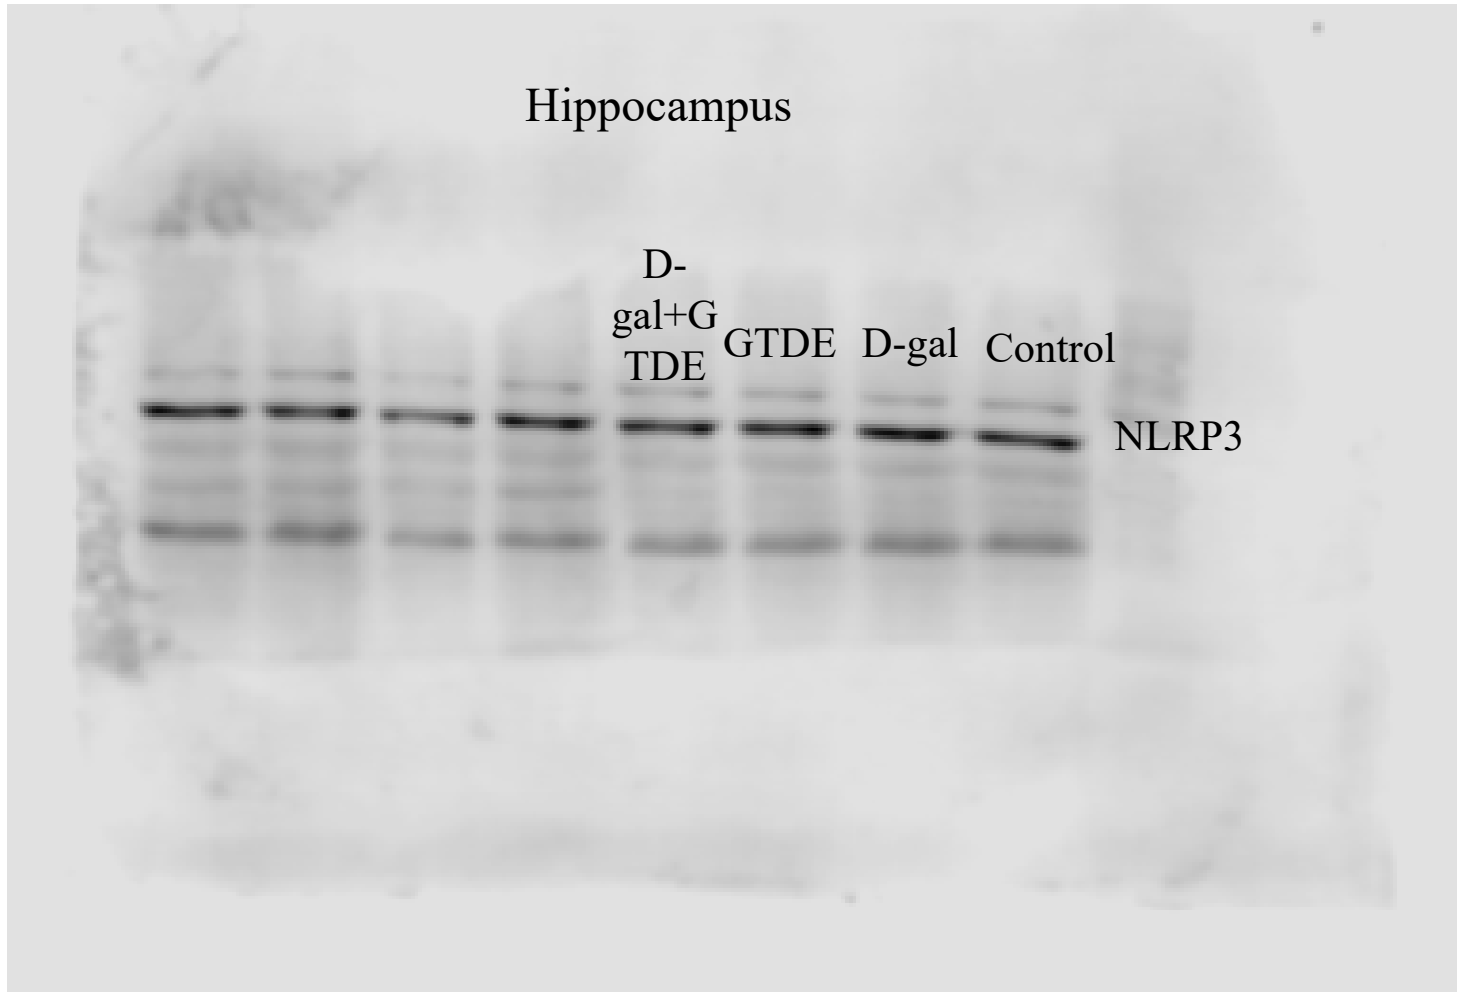

Hippocampus

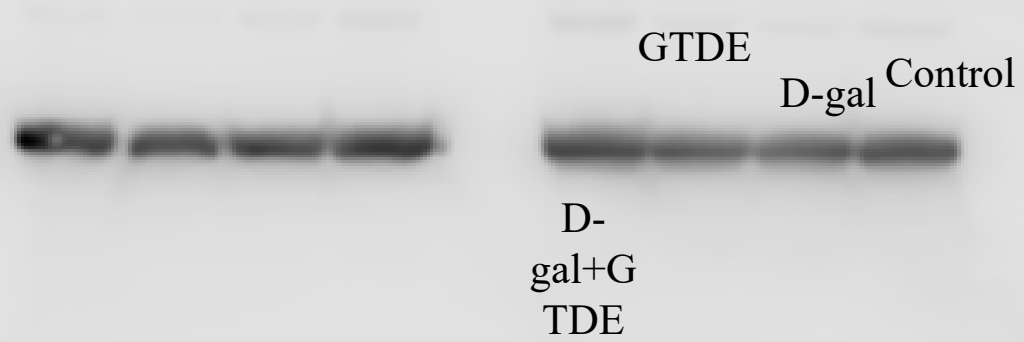

GAPDH

Cortex

D-  
gal+GT  
DE    GTDE    D-gal    Control

NLRP3

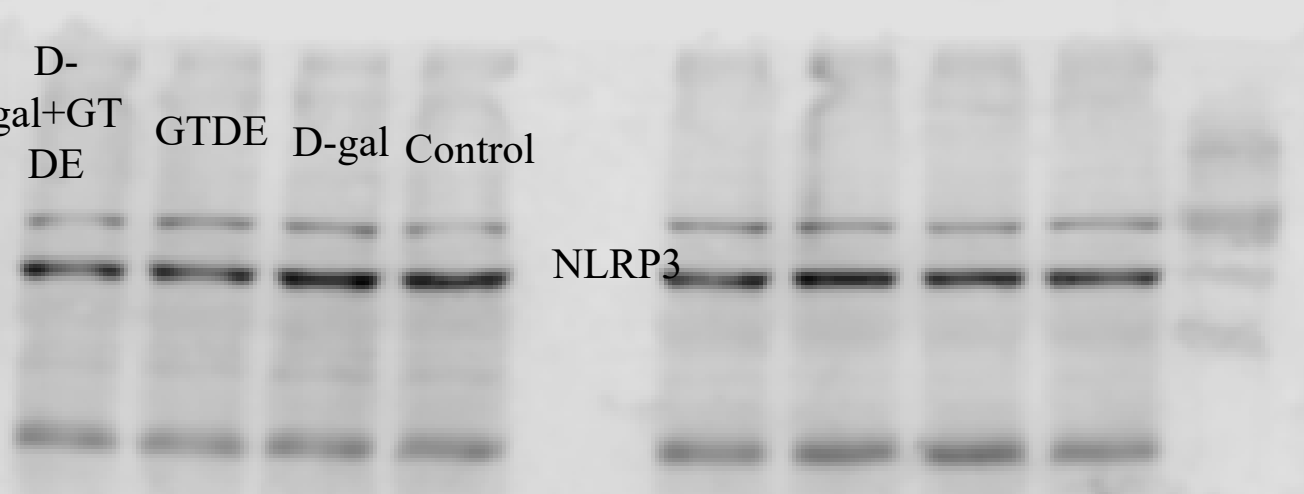

Cortex

D-  
gal+GT  
DE

Control

GTDE

D-gal

GAPDH

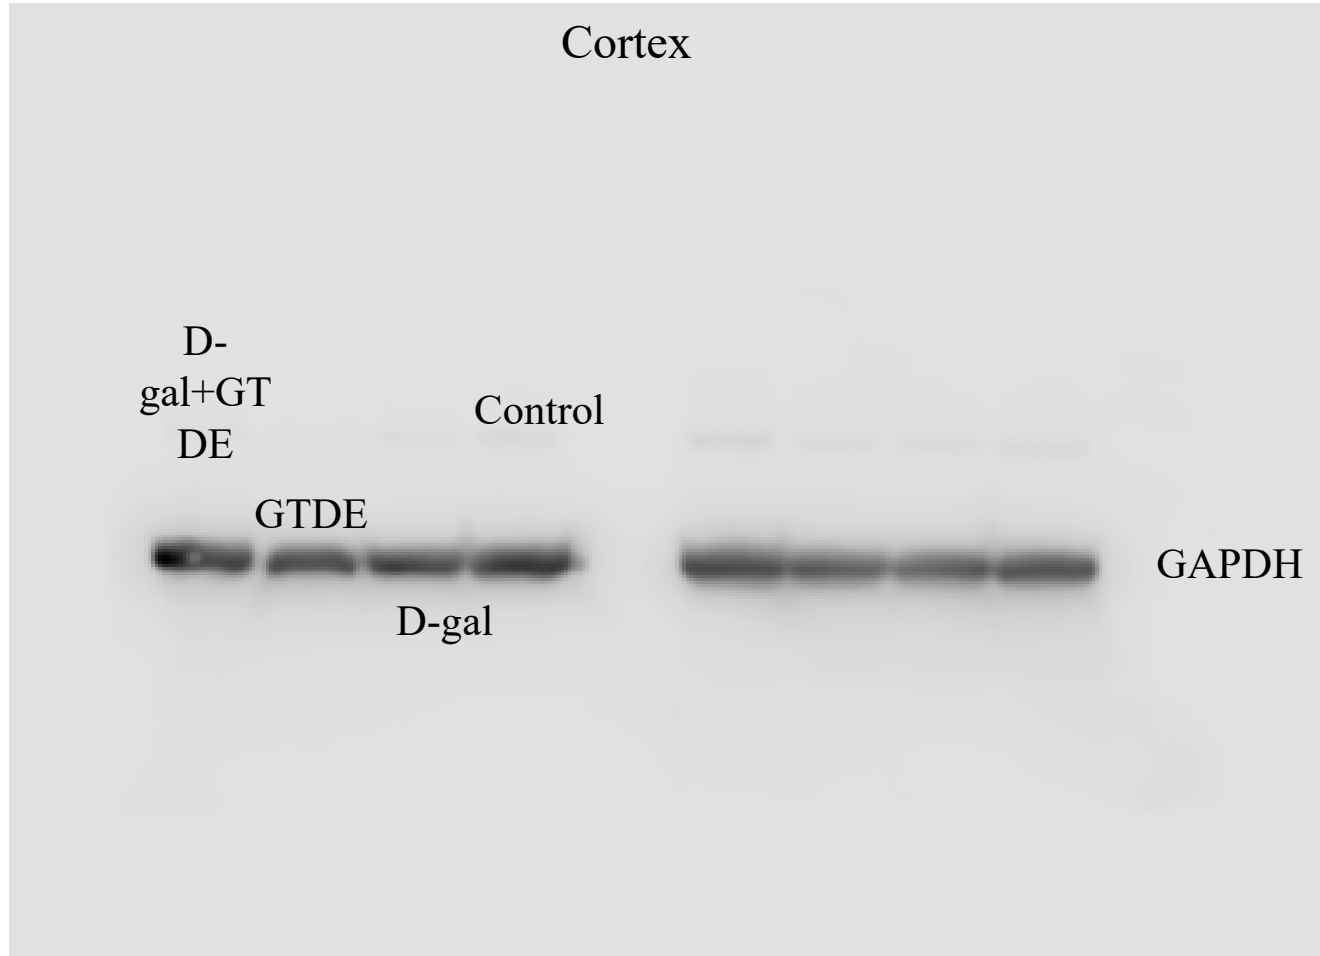

Supplement: pone.0266331.s001.pdf [file pone.0266331.s001.pdf]
